# Supplementary material
Source: PubMed Central journal article supplement (PMC6237230)

Supplementary Table 1

|                                   | <b>HIV 1</b> | <b>HIV 2</b>  | <b>HIV 3</b> | <b>Uninfected 1</b> | <b>Uninfected 2</b> |
|-----------------------------------|--------------|---------------|--------------|---------------------|---------------------|
| Age                               | 51           | 33            | 47           | 49                  | 59                  |
| Sex                               | Male         | Male          | Male         | Male                | Male                |
| Nadir CD4                         | unknown      | 78            | 397          | -                   | -                   |
| History of substance use disorder | Yes          | No            | Yes          | Yes                 | Yes                 |
| History of alcohol use disorder   | Yes          | No            | Yes          | No                  | Yes                 |
| History of smoking                | Former       | Never         | Current      | Current             | Unknown             |
| current CD4+ cells/mL             | 391          | 424           | 967          | 922                 | 775                 |
| HIV RNA plasma copies/mL          | not detected | <20           | <20          | -                   | -                   |
| HIV RNA CSF copies/mL             | not detected | 99            | 38           | -                   | -                   |
| CSF cell count, cells/uL          | 1            | 3             | 1            | 0                   | 4                   |
| CSF protein mg/dL                 | 42           | 20            | 25           | 26                  | 53                  |
| CSF albumin mg/dL                 | 22           | 11.3          | 13.8         | 17.4                | 40.9                |
| CSF neopterin nmol/L              | 18.5         | 10.5          | 11.5         | 6.1                 | 5.7                 |
| Plasma neopterin nmol/L           | 11.705       | 7.8           | 20.8         | 7.5                 | 9.8                 |
| Neurological complaint            | none         | spastic gait  | none         | none                | none                |
| NP Total Z-score                  | -1.38        | -1.06         | -0.34        | -1.85               | -0.36               |
| Current ART regimen               | ABC-3TC-DTG  | TDF-DRV-c-DTG | TDF-FTC-RPV  | -                   | -                   |
| Hepatitis C status                | cured        | negative      | negative     | positive            | cured               |

Supplementary Table 2. Genes whose expression is up-regulated in Myeloid-2 compared to the four other myeloid subsets (FDR<0.01)

|           |          |
|-----------|----------|
| APOC1     | GATM     |
| APOE      | GGTA1P   |
| ARHGAP18  | HAVCR2   |
| AXL       | HLA-DMA  |
| BHLHE41   | HLA-DMB  |
| C1QA      | HLA-DPA1 |
| C1QB      | HLA-DPB1 |
| C1QC      | HLA-DQA1 |
| C3        | HLA-DRA  |
| CCR5      | HLA-DRB1 |
| CD14      | HSPB1    |
| CD74      | IL18     |
| CHCHD3    | LYVE1    |
| COLEC12   | MAF      |
| CTSB      | MARCO    |
| CTSL      | MIR4426  |
| CTTNBP2NL | MSR1     |
| CYFIP1    | OLR1     |
| DAB2      | PTMS     |
| DOCK4     | RB1      |
| DPYSL2    | RNASE1   |
| EEF1A1    | SCIN     |
| EEF1B2    | SELENOP  |
| EPB41L2   | SLC2A5   |
| F13A1     | TMSB10   |
| FAU       | TPT1     |
| FCGBP     | TREM2    |
| FOLR2     | VAMP8    |
| FSCN1     | VSIG4    |
| FTL       | ZFHX3    |

Supplementary Figure 1.  
Gene expression for canonical marker genes, overlaid on the tSNE visualization.

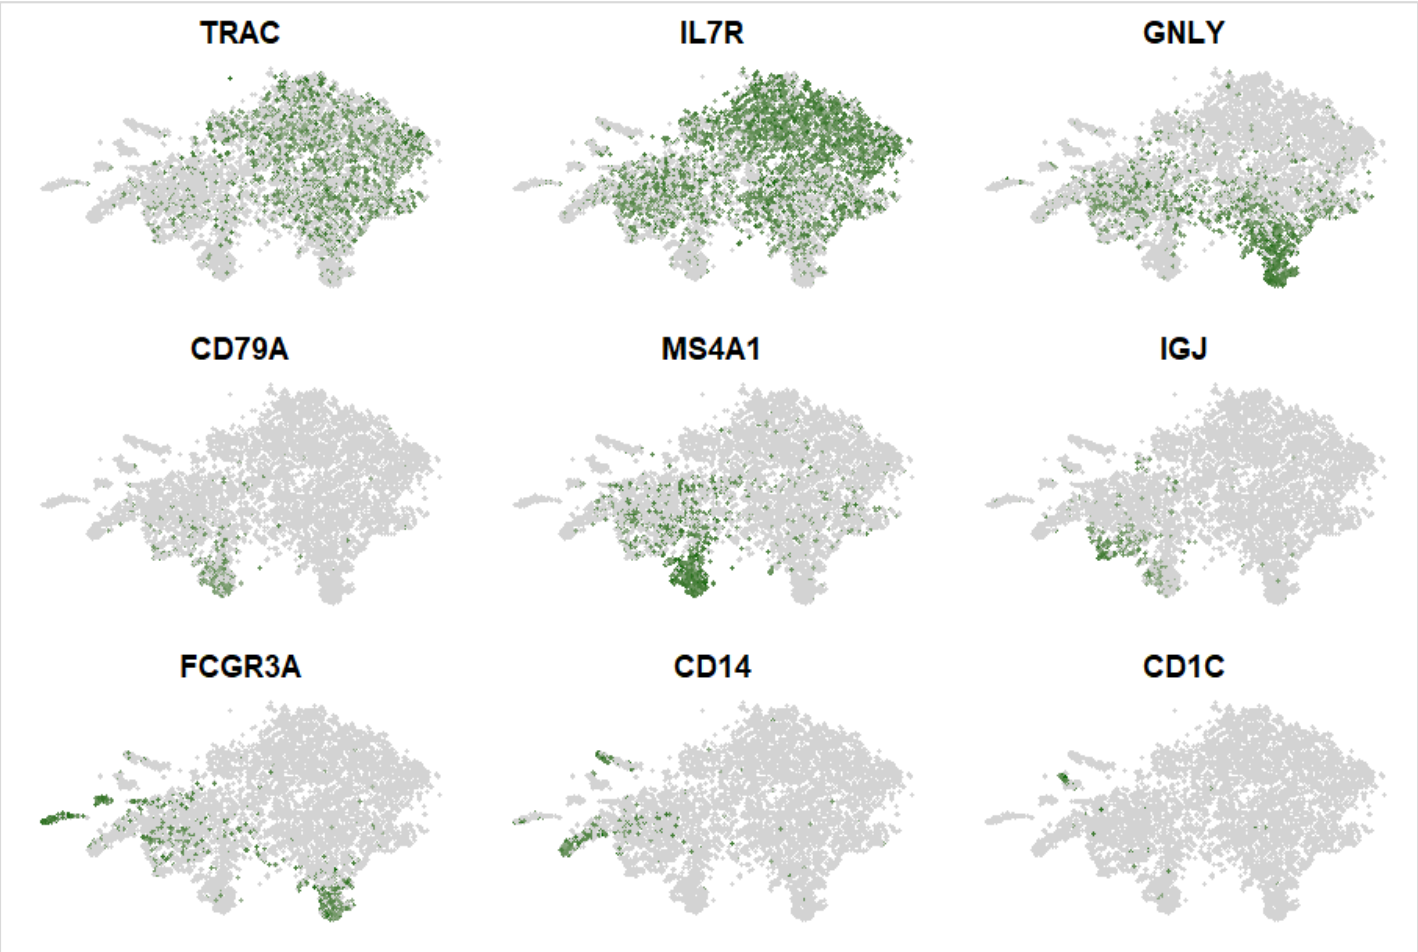

Supplement: jciinsight-3-121718-s176.pdf [file jciinsight-3-121718-s176.pdf]
